# Supplementary material for: Unsupervised Classification of Neolithic Pottery From the Northern Alpine Space Using t-SNE and HDBSCAN
Source: publisher site journal article supplement (doi:10.1515/opar-2022-0274), 2022-01-01
Supplement: Supplementary file 1 [file variable_names_translation_english.xlsx]

## Sheet: variable_names_groups
variable (German)	translation (English)
dm_1	Diameter 1
dm_2	Diameter 2
knubben.am_Umbruch_Mitte	lug at break (shoulder rsp. belly), middle
knubben.Rand_Hals	lug at rim or neck
knubben.Randlippe	lug at rim lip
knubben.ueber_Umbruch_Oberteil	lug above break (shoulder rsp. belly), upper part
knubben.unter_Umbruch_Unterteil	lug above break (shoulder rsp. belly), lower part
knubben.unterhalb_Randlippe	lug below rim lip
knubben_serie.1_fach	lug series 1x
knubben_serie.2_fach	lug series 2x
knubben_serie.3_fach	lug series 3x
knubben_serie.doppelt	lug series double lug
knubben_serie.paarig	lug series pair
knubben_serie.sonstige	lug series other
knubben_serie.vielfach_begrenzt	lug series multiple delimited
knubben_form.indet	lug form indetermined
knubben_form.laenglich_horizontal	lug form elongated horizontal
knubben_form.laenglich_vertikal	lug form elongated vertical
knubben_form.rund	lug form round
knubben_form.sonstige	lug form other
knubben_form.spitz	lug form pointed
henkel.hochgezogen	handle raised
henkel.indet	handle indetermined
henkel.randstaendig	handle ending at the rim
henkel.unterstaendig	handle ending below the rim
henkel_form.indet	handle form indetermined
henkel_form.ohrfoermig	handle form earshaped
henkel_form.oval	handle form oval
henkel_form.rund	handle form round
bodenform.abgeflacht	bottom shape flatted
bodenform.flach	bottom shape flat
bodenform.hochgezogen	bottom shape raised
bodenform.rund	bottom shape round
bodenform.spitz	bottom shape pointed
bodenform.Standboden	bottom shape with protruding lower part
umbruchform.Absatz_aussen	break (shoulder rsp. belly) with step at external wall
umbruchform.Ueberhang	break (shoulder rsp. belly) hanging over
umbruchform.Ecke_innen	break (shoulder rsp. belly) corner at inner wall
oese.am_Umbruch_Mitte	eyelet at break (shoulder rsp. belly) middle
oese.Rand_Hals	eyelet rim rsp. neck
oese.ueber_Umbruch_Oberteil	eyelet above break (shoulder rsp. belly), upper part
oese.unter_Umbruch_Unterteil	eyelet below break, lower part
oese.unterhlab_Randlippe	eyelet below rim rsp. lip
oese_form.indet	eyelet form indetermined
oese_form.Leiste_horizontal	eyelet form ledge horizontal
oese_form.Lochung	eyelet form perforation
oese_form.oval_horizontal	eyelet form oval horizontal
oese_form.oval_vertikal	eyelet form oval vertical
oese_form.pyramidal_horizontal	eyelet form pyramidal horizontal
oese_form.rund	eyelet form round
oese_form.tunnelfoermig_horizontal	eyelet form tunnel shaped horizontal
oese_loch_anzahl.1	eyelet quantity 1
oese_loch_anzahl.2	eyelet quantity 2
oese_loch_anzahl.3	eyelet quantity 3
oese_loch_anzahl.4	eyelet quantity 4
oese_loch_anzahl.indet	eyelet quantity indetermined
oese_loch_anzahl.ueber_4	eyelet quantity more than 4
oese_serie.1_fach	eyelet series 1x
oese_serie.2_fach	eyelet series 2x
oese_serie.3_fach	eyelet series 3x
oese_serie.4_fach	eyelet series 4x
oese_serie.doppelt	eyelet series double
oese_serie.gegenständig	eyelet series opposite
oese_serie.paarig	eyelet series pair
oese_serie.vielfach	eyelet series multiple
oese_orientierung.horizontal	eyelet orientation horizontal
oese_orientierung.indet	eyelet orientation indetermined
oese_orientierung.vertikal	eyelet orientation vertical
oese_oesenkranz	eyelet garland
leisten.am_Umbruch_Mitte	ledge at break (shoulder rsp. belly), middle
leisten.Henkel	ledge handle
leisten.Randlippe	ledge rim lip
leisten.unter_Umbruch_Unterteil	ledge below break (shoulder rsp. belly), lower part
leisten.unterhalb_Randlippe	ledge below rim lip
leisten_form.Arkadenleiste	ledge form arcade
leisten_form.glatte_Leiste	ledge form smooth
leisten_form.Leiste_Eindruecke	ledge form impressions
leisten_form.sonstige	ledge form other
rauhung.ganzer_Gefaesskoerper	roughening whole vessel body
einstich_eindruck.am_Umbruch_Mitte	groove rsp. impression at break, middle
einstich_eindruck.ganzer_Gefaesskoerper	groove rsp. impression whole vessel body
einstich_eindruck.Rand_Hals	groove rsp. impression rim neck
einstich_eindruck.Randlippe	groove rsp. impression rim lip
einstich_eindruck.ueber_Umbruch_Oberteil	groove rsp. impression above break (shoulder rsp. belly), upper part
einstich_eindruck.unter_Umbruch_Unterteil	groove rsp. impression below break (shoulder rsp. belly), lower part
einstich_eindruck.unterhalb_Randlippe	groove rsp. impression below rim lip
komplexe_ritzverzierung	Elaborate decoration with incisions
